# Supplementary material for: Cellular and Molecular Signatures of Oxidative Stress in Bronchial Epithelial Cell Models Injured by Cigarette Smoke Extract
Source: MDPI journal article supplement (doi:10.3390/ijms23031770), 2022-02-04
Supplement: s1 [file s1]

## **Cellular and molecular signatures of oxidative stress in bronchial epithelial cell models injured by cigarette smoke extract: Search Strategy.**

### **PUBMED**

("Oxidative Stress"[Mesh] OR "oxidative stress\*" [TIAB]) AND ("Epithelial Cells"[Mesh] OR "alveolar epithelial cell\*" [TIAB] OR "lung epithelial cell\*" [TIAB] OR "airway epithelial cell\*" [TIAB] OR "bronchial epithelial cell\*" [TIAB]) AND ("Smoke"[Mesh] OR smok\* [TIAB] OR cigarette\* [TIAB] OR tobacco [TIAB]) AND y\_10 [Filter] AND english [Filter] AND fha [Filter] NOT ("animals" [Mesh] NOT "humans" [Mesh])

### **SCOPUS**

TITLE-ABS-KEY("oxidative stress\*") AND TITLE-ABS-KEY("alveolar epithelial cell\*" OR "lung epithelial cell\*" OR "airway epithelial cell\*" OR "bronchial epithelial cell\*") AND TITLE-ABS-KEY(smok\* OR cigarette\* OR tobacco) AND PUBYEAR AFT 2010 AND LANGUAGE(english)

### **WEB OF SCIENCE**

(TI=("oxidative stress\*") OR AB=("oxidative stress\*")) AND (TI=("alveolar epithelial cell\*" OR "lung epithelial cell\*" OR "airway epithelial cell\*" OR "bronchial epithelial cell\*") OR AB=("alveolar epithelial cell\*" OR "lung epithelial cell\*" OR "airway epithelial cell\*" OR "bronchial epithelial cell\*")) AND (TI=(smok\* OR cigarette\* OR tobacco) OR AB=(smok\* OR cigarette\* OR tobacco)) AND PY=(2011-2021) AND LA=(English)

### **EMBASE**

('oxidative stress'/exp/mj OR 'oxidative stress\*':ab,ti) AND ('epithelium cell'/exp/mj OR 'alveolar epithelial cell\*':ab,ti OR 'lung epithelial cell\*':ab,ti OR 'airway epithelial cell\*':ab,ti OR 'bronchial epithelial cell\*':ab,ti) AND ('smoke'/exp/mj OR smok\*':ab,ti OR cigarette\*':ab,ti OR tobacco:ab,ti) AND [english]/lim AND [embase]/lim AND [2011-2021]/py NOT ([animals]/lim NOT [humans]/lim)
